# Supplementary material for: Facile synthesis of silver and bimetallic silver–gold nanoparticles and their applications in surface-enhanced Raman scattering
Source: Royal Society of Chemistry journal article supplement (doi:10.1039/c4ra09956g), 2014-01-01
Supplement: c4ra09956g1.pdf [file c4ra09956g1.pdf]

## Supplementary Material

1

### Facile synthesis of silver and bimetallic silver-gold nanoparticles and their applications in surface-enhanced Raman scattering

Bharat Baruah,\* Meshack Kiambuthi

*Department of Chemistry and Biochemistry, Kennesaw State University, Kennesaw, GA 30144-5591*

Corresponding author\_Tel: +1 678 797 2654; fax: + 1 770 423 6744.

E-mail address: [bbaruah@kennesaw.edu](mailto:bbaruah@kennesaw.edu)

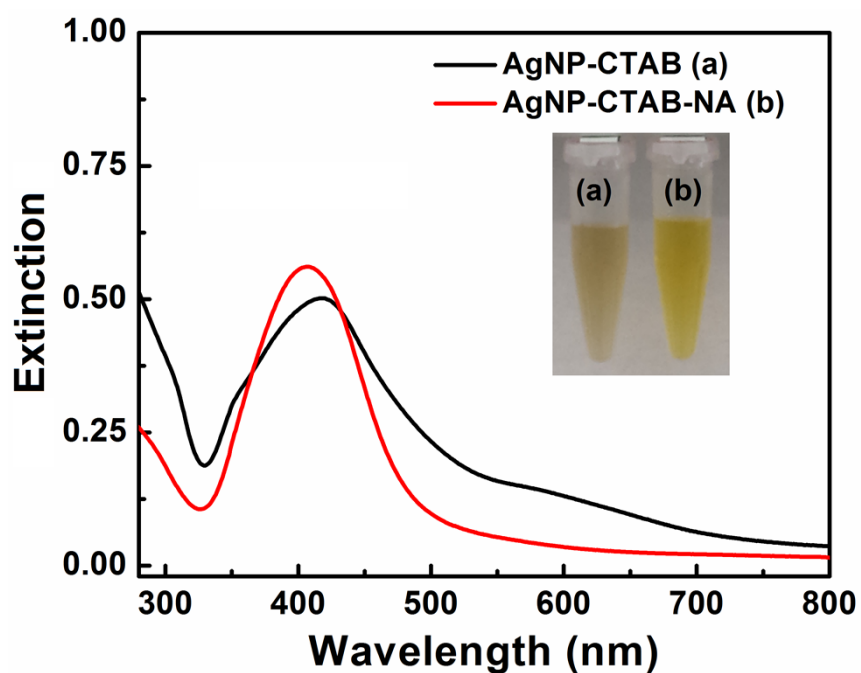

**Figure S1.** UV-visible spectra of colloidal solutions: (a) AgNP-CTAB (black line), and (b) AgNP-CTAB-NA (red line). Inset shows the corresponding digital photographs of these colloids

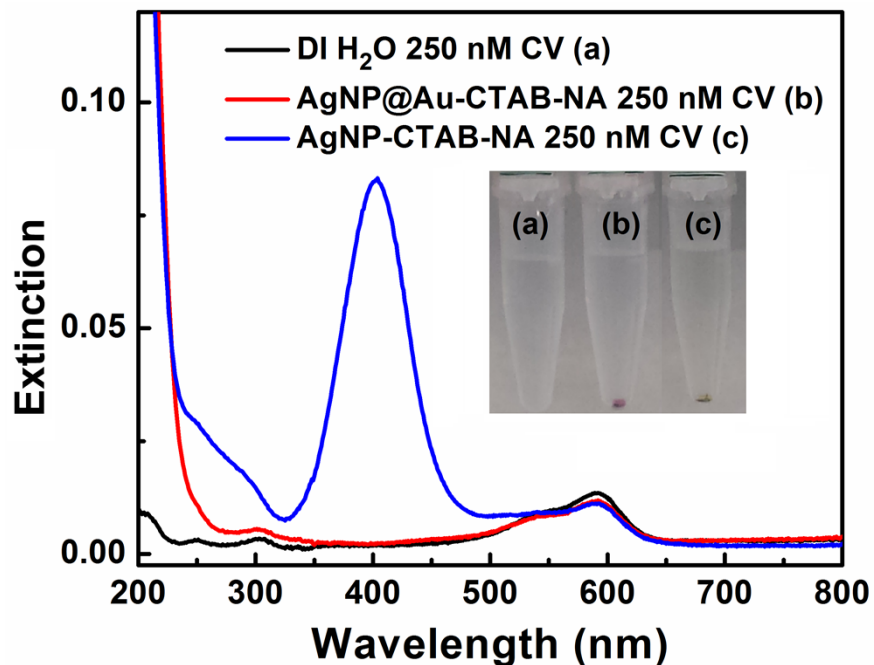

**Figure S2.** UV-Visible spectra of (a) aqueous solution of crystal violet (black line) at 250 nM, (b) supernatant of AgNP@Au-CTAB-NA after centrifugation containing 250 nM crystal violet (red line) and (c) supernatant of AgNP-CTAB-NA after centrifugation containing 250 nM crystal violet (blue line). This supernatant also contains un-precipitated AgNP-CTAB-NA evident from signal at  $\sim 403$  nm. Inset shows the corresponding digital photographs of these colloids.

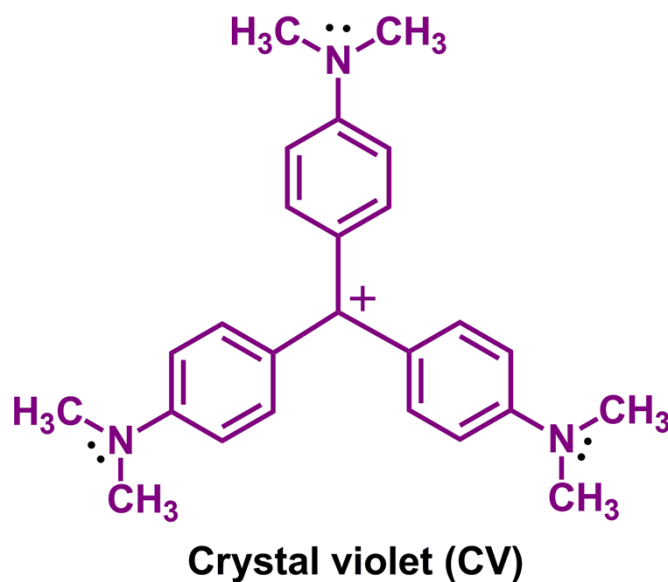

**Figure S3.** Molecular structure of crystal violet (CV).

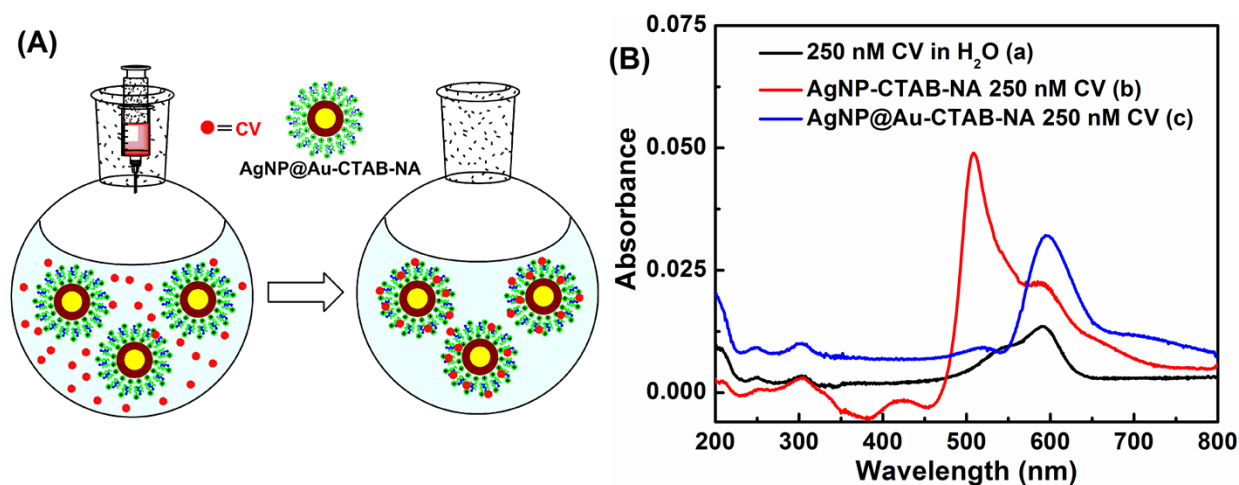

**Figure S4.** (A) This cartoon represents adsorption of CV molecules into the CTAB bilayer of AgNP@Au-CTAB-NA colloids due to hydrophobic forces. (B) UV-visible spectra of (a) aqueous solution of crystal violet (black line) at 250 nM, (b) subtraction spectrum between AgNP-CTAB-NA with 0.0 nm CV and AgNP-CTAB-NA with 250 nm CV (red line), and (c) subtraction spectrum between AgNP@Au-CTAB-NA with 0.0 nm CV and AgNP@Au-CTAB-NA with 250 nm CV (blue line).
